# Supplementary material
Source: publisher site journal article supplement (https://www.dovepress.com/article/609918)
Supplement: Supplementary file 1 [file 609918_Revised%20Supplementary%20Material%20Clean%20version.docx]

**Supplementary Material**


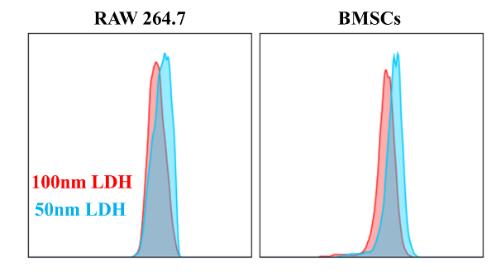


**Figure S1.** Flow-cytometric analysis of LDH uptake by macrophages and BMSCs.

**Figure S2.** Quantitative analyses of new bone area percentage and collagen deposition area.

Table S1. The qPCR primer used in this work.

| Gene name | Forward primer (5’-3’) | Reverse primer (5’-3’) |
| --- | --- | --- |
| *Gapdh* | AGTGCCAGCCTCGTCTCATA | TGAACTTGCCGTGGGTAGAG |
| *Opn* | TTGGCTTTGCAGTCTCCTGCGG | AGGCAAGGCCGAACAGGCAAA |
| *Runx2* | CCATAACGGTCTTCACAAATCCT | TCTGTCTGTGCCTTCTTGGTTC |
| *Ocn* | GCTGCTACTGTGGAAGAGAAGG | CCACAGATGACTGAGAACGCCT |
| *Bmp2* | CACGAAGAAGCCATCGAGGA | GCTTCCTGCATTTGTTCCCG |
| *Il-4* | ATCATCGGCATTTTGAACGAGGTC | ACCTTGGAAGCCCTACAGACGA |
| *Il-10* | GCTGGACAACATACTGCTAACC | ATTTCCGATAAGGCTTGGCAA |
| *iNOS* | GAGACAGGGAAGTCTGAAGCAC | CCAGCAGTAGTTGCTCCTCTTC |
| *Il-1β* | TGGACCTTCCAGGATGAGGACA | GTTCATCTCGGAGCCTGTAGTG |
| *Dvl* | ATCACACGCACCAGCTCTTCCT | AGTCCTGAGTCTGGCAACTGCA |
| *β-catenin* | GTTCGCCTTCATTATGGACTGCC | ATAGCACCCTGTTCCCGCAAAG |
| *Rela* | TCCTGTTCGAGTCTCCATGCAG | GGTCTCATAGGTCCTTTTGCGC |
| *Fzd2* | CGCTTCCACTTTCTTCACGGTC | GGAGAACGAAGCCCGCAATGTA |

Table S2. Descriptive statistics of M1 and M2 markers in macrophages.

| Group | n | *iNOS* | *Il-1β* | *Il-4* | *Il-10* |
| --- | --- | --- | --- | --- | --- |
| M0 | 3 | mean ± SD | mean ± SD | mean ± SD | mean ± SD |
| M1 | 3 | mean ± SD | mean ± SD | mean ± SD | mean ± SD |
| 100 nm LDH | 3 | mean ± SD | mean ± SD | mean ± SD | mean ± SD |
| 50 nm LDH | 3 | mean ± SD | mean ± SD | mean ± SD | mean ± SD |

Table S3. Descriptive statistics of osteogenic markers in BMSCs.

| Group | n | *Ocn* | *Opn* | *Runx2* | *Bmp2* |
| --- | --- | --- | --- | --- | --- |
| Ctrl | 3 | mean ± SD | mean ± SD | mean ± SD | mean ± SD |
| 100 nm LDH | 3 | mean ± SD | mean ± SD | mean ± SD | mean ± SD |
| 50 nm LDH | 3 | mean ± SD | mean ± SD | mean ± SD | mean ± SD |

Table S4. Descriptive statistics of micro-CT outcomes at 12 weeks.

| Group | n | BV/TV | BMD |
| --- | --- | --- | --- |
| GelMA | 3 | mean ± SD | mean ± SD |
| GelMA-100 nm LDH | 3 | mean ± SD | mean ± SD |
| GelMA-50 nm LDH | 3 | mean ± SD | mean ± SD |
